# Supplementary material
Source: Springer Nature journal article supplement (https://www.springermedizin.de/resource/supplementary/12882_2013_765_MOESM6_ESM.pdf/9454670)

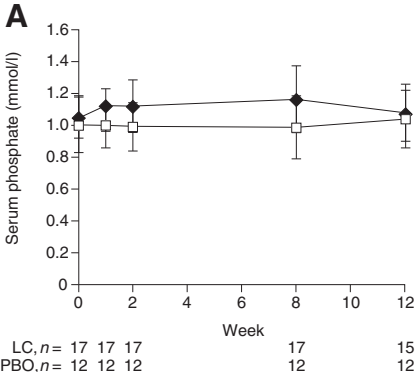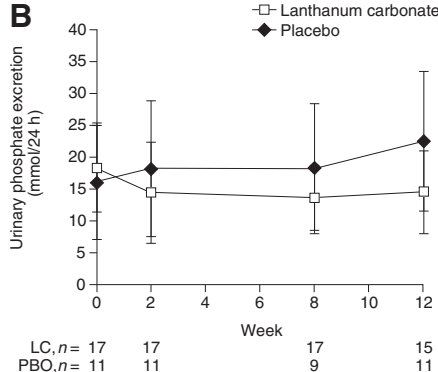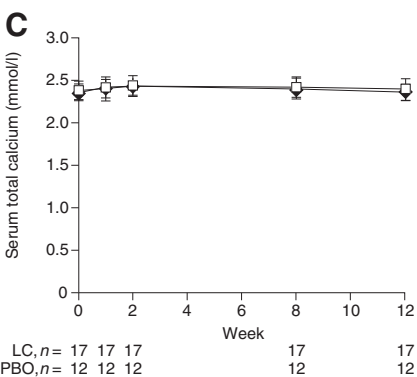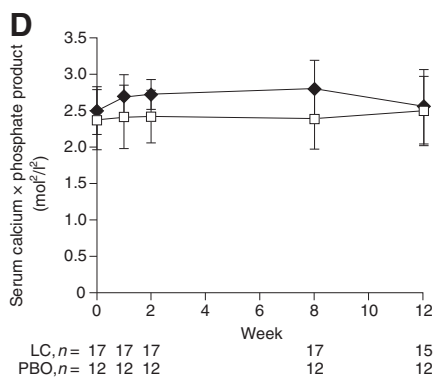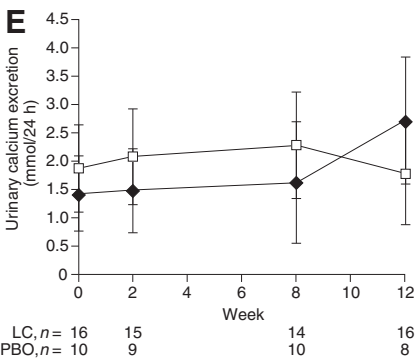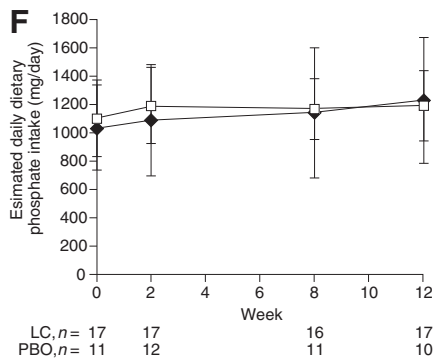

Supplement: MOESM6 [file 9454670]
